# Supplementary material
Source: PubMed Central journal article supplement (PMC3526380)
Supplement: NIHMS355511-supplement-supplemental_data.pdf [file NIHMS355511-supplement-supplemental_data.pdf]

Supplemental figures

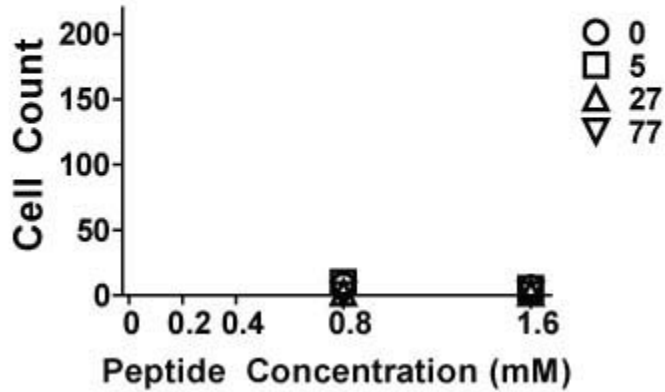

Supplemental figure 1. hTCEpi cell count on control surfaces that were functionalized with the respective PEG<sub>x</sub> spacer- GGGRDGSP conjugate, where x=0,5,27 or 77. There was no significant cell attachment for all conditions tested.

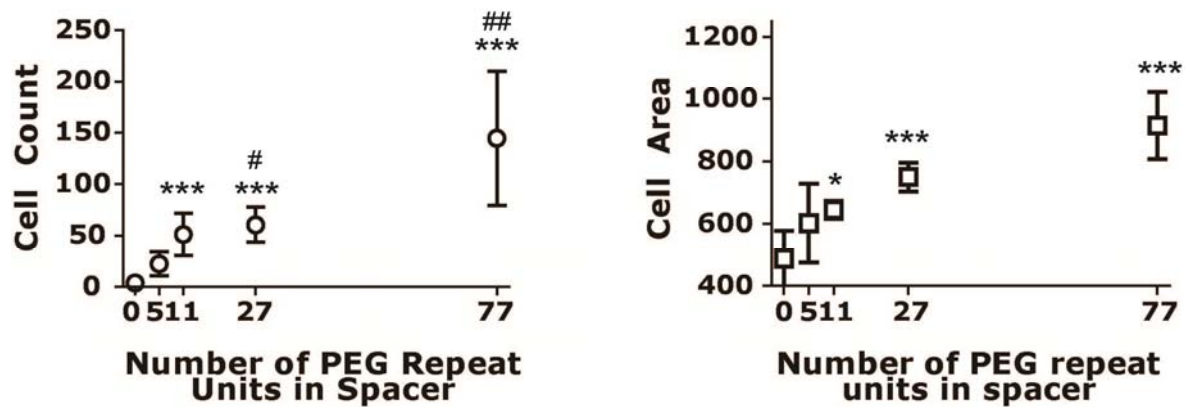

Supplemental figure 2. hTCEpi cell count and cell spreading data plotted with respect to length of PEG spacer for final RGD concentrations near 0.8mM demonstrate the non-linear relationship between spacer length and cell response. \*0.01≤p<0.05, \*\*\*p<0.001 is the significance compared to the x=0 (no spacer condition) and #0.01≤p <0.05, ##0.001≤p <0.01 is the significance compared to the PEG<sub>5</sub>-RGD condition.
